# Supplementary material
Source: Elsevier journal article supplement (http://authors.library.caltech.edu/records/psp7j-nmv35/files/mmc4.zip)
Supplement: mmc4 [file mmc4.zip]

Archive with 1 entries (1 files):
- DataS1.html
